# Supplementary material for: The Impact of Previous Comorbidities on New Comorbidities and Medications after a Mild SARS-CoV-2 Infection in a Lithuanian Cohort
Source: MDPI journal article supplement (doi:10.3390/jcm13020623), 2024-01-22
Supplement: s1 [file s1]

**Supplemental Material S1.**

Links to websites where the information about the study was distributed.

<https://www.kaunoklinikos.lt/apie-mus/naujienos/covid-19-liga-kokie-pozymiai-ir-liekamieji-reiskiniai-labiausiai-vargina-lietuvius.html>

[https://www.facebook.com/groups/Virusas/?multi\\_permalink=648288256333847](https://www.facebook.com/groups/Virusas/?multi_permalink=648288256333847)

[https://www.facebook.com/groups/1994091020875362/?multi\\_permalink=3124472811170505](https://www.facebook.com/groups/1994091020875362/?multi_permalink=3124472811170505) (closed)

<https://www.facebook.com/groups/159021887526863>

[https://www.facebook.com/groups/412929278885515/?multi\\_permalink=2097940567051036](https://www.facebook.com/groups/412929278885515/?multi_permalink=2097940567051036) (closed)

<https://www.facebook.com/groups/3495414077220547>

<https://www.facebook.com/groups/lietuvos.mamyciu.turgelis>

<https://www.facebook.com/groups/1312138168987450>

<https://www.facebook.com/groups/371615077313631>

## Survey of participants.

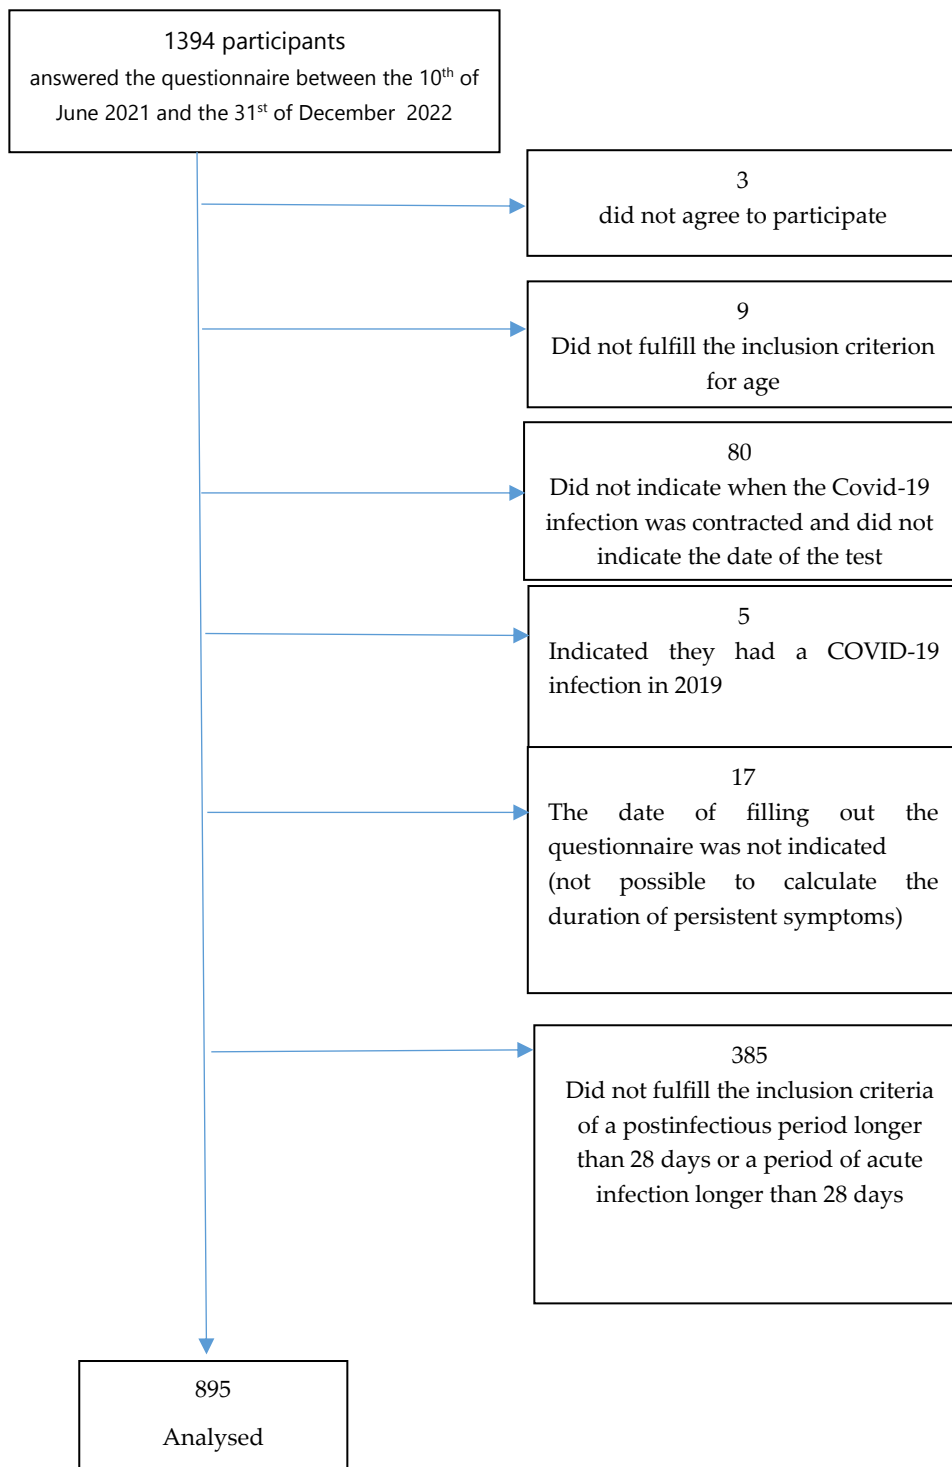

**Supplemental Material S2.** Persistent symptoms in 895 participants are presented as numbers and percentages in a whole cohort and among those reported as “healthy” and “unhealthy” prior the infection. The data show all persistent symptoms “healthy” vs “unhealthy” prior acute SARS-CoV-2 infection. Differences between these two latter groups are presented in p-values and p-value lower than 0.05 is indicated in a bold style.

|                                                                                                                        | All N=895<br>(%) | “Healthy”<br>N=473<br>(52.8%) | “Unhealthy”<br>N=422<br>(47.2%) | Statistics        |
|------------------------------------------------------------------------------------------------------------------------|------------------|-------------------------------|---------------------------------|-------------------|
| 1. Decrease in physical capacity/absence of strength (N1)                                                              | 479<br>(53.5%)   | 231<br>(25.8%)                | 248 (27.7%)                     | <b>p=0.002</b>    |
| 2. General fatigue (N2)                                                                                                | 478<br>(53.4%)   | 241<br>(26.9%)                | 237 (26.5%)                     | p=0.068           |
| 3. Memory disorders (N3)                                                                                               | 425<br>(47.5%)   | 207<br>(23.1%)                | 21 (24.4%)                      | <b>p=0.011</b>    |
| 4. Disorders of attention, concentration, concentration (N4)                                                           | 356<br>(39.8%)   | 175<br>(19.6%)                | 181 (20.2%)                     | <b>p=0.042</b>    |
| 5. Partial/total loss of smell (Th1)                                                                                   | 270<br>(30.2%)   | 136<br>(15.2%)                | 134 (15.0%)                     | p=0.183           |
| 6. Headache (Cp1)                                                                                                      | 259<br>(28.9%)   | 124<br>(13.9%)                | 135 (15.1%)                     | <b>p=0.034</b>    |
| 7. Palpitations/tachycardia/arrhythmia (C1)                                                                            | 257<br>(28.7%)   | 103<br>(11.5%)                | 154 (17.2%)                     | <b>p&lt;0.001</b> |
| 8. Hair loss (S1)                                                                                                      | 254<br>(28.4%)   | 114<br>(12.7%)                | 140 (15.6%)                     | <b>p=0.002</b>    |
| 9. Mood swings (sadness, confusion, irritability) (P1)                                                                 | 237<br>(26.5%)   | 129<br>(14.4%)                | 108 (12.1%)                     | p=0.311           |
| 10. Insomnia (N5)                                                                                                      | 212<br>(23.7%)   | 93 (10.4%)                    | 119 (13.3%)                     | <b>p=0.002</b>    |
| 11. Head dizziness (N6)                                                                                                | 197<br>(22.0%)   | 100<br>(11.2%)                | 97 (10.8%)                      | p=0.279           |
| 12. Body/muscle/bone/joint pain (Cp2)                                                                                  | 184<br>(20.6%)   | 60 (6.7%)                     | 124 (13.9%)                     | <b>p&lt;0.001</b> |
| 13. Various migrating/distressing pains in the body where it is difficult to pinpoint one specific painful place (Cp3) | 179<br>(20.0%)   | 70 (7.8%)                     | 109 (12.2%)                     | <b>p&lt;0.001</b> |
| 14. Anxiety (P2)                                                                                                       | 173<br>(19.3%)   | 87 (9.7%)                     | 86 (9.6%)                       | p=0.252           |
| 15. Shortness of breath/labored breathing (L1)                                                                         | 171<br>(19.1%)   | 66 (7.4%)                     | 105 (11.7%)                     | <b>p&lt;0.001</b> |
| 16. "Brain fog", heavy head, back pain (N7)                                                                            | 158<br>(17.7%)   | 81 (9.1%)                     | 77 (8.6%)                       | p=0.362           |
| 17. Night sweats (N8)                                                                                                  | 154<br>(17.2%)   | 58 (6.5%)                     | 96 (10.7%)                      | <b>p&lt;0.001</b> |
| 18. Excessive/unusual sleepiness (N9)                                                                                  | 152<br>(17.0%)   | 74 (8.3%)                     | 78 (8.7%)                       | p=0.149           |

|                                                             |                |           |           |                   |
|-------------------------------------------------------------|----------------|-----------|-----------|-------------------|
| 19. Chest pain/pressure (C2)                                | 148<br>(16.5%) | 67 (7.5%) | 81 (9.1%) | <b>p=0.027</b>    |
| 20. Partial/total loss of taste (Th2)                       | 136<br>(15.2%) | 72 (8.0%) | 62 (7.2%) | p=0.528           |
| 21. Lower back pain (Cp4)                                   | 133<br>(14.9%) | 50 (5.6%) | 83 (9.3%) | <b>p&lt;0.001</b> |
| 22. Blurred vision (V1)                                     | 127<br>(14.2%) | 50 (5.6%) | 77 (8.6%) | <b>p&lt;0.001</b> |
| 23. Fluctuating symptoms (some come and go) (O1)            | 109<br>(12.2%) | 44 (4.9%) | 65 (7.3%) | <b>p=0.004</b>    |
| 24. Balance/equilibrium disorders (N10)                     | 108<br>(12.1%) | 45 (5.0%) | 63 (7.0%) | <b>p=0.009</b>    |
| 25. "Dry" eyes (V2)                                         | 105<br>(11.7%) | 42 (4.7%) | 63 (7.0%) | <b>p=0.003</b>    |
| 26. Others Sleep consents (N11)                             | 102<br>(11.4%) | 43 (4.8%) | 59 (6.6%) | <b>p=0.014</b>    |
| 27. Increased blood pressure (C3)                           | 102<br>(11.4%) | 27 (3.0%) | 75 (8.4%) | <b>p&lt;0.001</b> |
| 28. Reflux/heartburn (G1)                                   | 100<br>(11.2%) | 42 (4.7%) | 58 (6.5%) | <b>p=0.014</b>    |
| 29. Dry throat/"lump" in the throat (Th3)                   | 97<br>(10.8%)  | 40 (4.5%) | 57 (6.4%) | <b>p=0.010</b>    |
| 30. Dry, flaky skin (S2)                                    | 90<br>(10.1%)  | 38 (4.2%) | 52 (5.8%) | <b>p=0.022</b>    |
| 31. Hearing impairment<br>(tinnitus/tinnitus/jamming) (N12) | 87 (9.7%)      | 32 (3.6%) | 55 (6.1%) | <b>p=0.001</b>    |
| 32. Hand numbness/cold/pain/swelling (N13)                  | 84 (9.4%)      | 29 (3.2%) | 55 (6.1%) | <b>p&lt;0.001</b> |
| 33. Blinking/blinking in the eyes (V3)                      | 83 (9.3%)      | 38 (4.2%) | 45 (5.1%) | p=0.108           |
| 34. Feet numbness/cold/swelling/pain (N14)                  | 83 (9.3%)      | 27 (3.0%) | 56 (6.3%) | <b>p&lt;0.001</b> |
| 35. Weight gain (E2)                                        | 82 (9.2%)      | 29 (3.2%) | 53 (5.9%) | <b>p&lt;0.001</b> |
| 36. Cramps/twitches in various muscles of the body (N15)    | 79 (8.8%)      | 32 (3.6%) | 47 (5.3%) | <b>p=0.014</b>    |
| 37. Dry cough (L2)                                          | 77 (8.6%)      | 42 (4.7%) | 35 (3.9%) | p=0.424           |
| 38. Upper back/neck pain (Cp5)                              | 74 (8.3%)      | 20 (2.2%) | 54 (6.0%) | <b>p&lt;0.001</b> |
| 39. Other neuralgic pains (Cp6)                             | 63 (7.0%)      | 16 (1.8%) | 47 (5.3%) | <b>p&lt;0.001</b> |
| 40. Various skin rashes (S3)                                | 62 (6.9%)      | 25 (2.8%) | 37 (4.1%) | <b>p=0.028</b>    |
| 41. Congested/runny nose (Th4)                              | 62 (6.9%)      | 26 (2.9%) | 36 (4.0%) | <b>p=0.049</b>    |
| 42. Fear (P3)                                               | 62 (6.9%)      | 34 (3.8%) | 28 (3.1%) | p=0.424           |
| 43. Diarrhea/constipation (G2)                              | 61 (6.8%)      | 25 (2.8%) | 36 (4.0%) | <b>p=0.037</b>    |
| 44. Cough/sputum production (L3)                            | 61 (6.8%)      | 27 (3.0%) | 34 (3.8%) | p=0.104           |
| 45. Excessive/constant thirst (E3)                          | 57 (6.4%)      | 27 (3.0%) | 30 (3.4%) | p=0.236           |
| 46. Lack of appetite (E4)                                   | 56 (6.3%)      | 25 (2.8%) | 31 (3.5%) | p=0.129           |
| 47. Sore throat (Th5)                                       | 50 (5.6%)      | 18 (2.0%) | 32 (3.6%) | <b>p=0.010</b>    |
| 48. Nausea (G3)                                             | 50 (5.6%)      | 25 (2.8%) | 25 (2.8%) | p=0.393           |

|                                                                     |           |           |           |                |
|---------------------------------------------------------------------|-----------|-----------|-----------|----------------|
| 49. Painful/sensitive scalp (S4)                                    | 47 (5.3%) | 16 (1.8%) | 31 (3.5%) | <b>p=0.006</b> |
| 50. Weight loss (E5)                                                | 44 (4.9%) | 23 (2.6%) | 21 (2.3%) | p=0.529        |
| 51. Mouth sores/ulcers (Th6)                                        | 34 (3.8%) | 13 (1.5%) | 21 (2.3%) | p=0.059        |
| 52. Kidney pains/urination problems (O2)                            | 32 (3.6%) | 11 (1.2%) | 21 (2.3%) | <b>p=0.025</b> |
| 53. Decreased blood pressure (C4)                                   | 31 (3.5%) | 16 (1.8%) | 15 (1.7%) | p=0.516        |
| 54. Prolonged elevated body temperature (E6)                        | 31 (3.5%) | 17 (1.9%) | 14 (1.6%) | p=0.484        |
| 55. Pain in the nasal area (Th7)                                    | 30 (3.4%) | 11 (1.2%) | 19 (2.1%) | p=0.052        |
| 56. Anaemia (O3)                                                    | 28 (3.1%) | 12 (1.3%) | 16 (1.8%) | p=0.188        |
| 57. Chills without fever (E7)                                       | 27 (3.0%) | 13 (1.5%) | 14 (1.6%) | p=0.381        |
| 58. Abnormally low body temperature (E8)                            | 21 (2.3%) | 10 (1.1%) | 11 (1.2%) | p=0.395        |
| 59. Changed salivation (Th8)                                        | 20 (2.2%) | 7 (0.8%)  | 13 (1.5%) | p=0.082        |
| 60. Other symptoms (record if you didn't find the right one) (O4)   | 19 (2.1%) | 8 (0.9%)  | 11 (1.2%) | p=0.237        |
| 61. Fever/ chills (E9)                                              | 18 (2.0%) | 6 (0.7%)  | 12 (1.3%) | p=0.075        |
| 62. Inflammations/infections of other body organs/body systems (O5) | 18 (2.0%) | 6 (0.7%)  | 12 (1.3%) | p=0.075        |
| 63. Eye inflammation/ "barley" (V4)                                 | 14 (1.6%) | 6 (0.7%)  | 8 (0.9%)  | p=0.313        |
| 64. Vomiting (G4)                                                   | 4 (0.4%)  | 1 (0.1%)  | 3 (0.3%)  | p=0.271        |

Abbreviations for remaining symptoms related to: N – nervous system (15 symptoms); Ch-chronic pain (6 symptoms); Th – throat, nose and ear (8 symptoms); C – cardiovascular (4 symptoms); P – psychological (3 symptoms); S – skin (4 symptoms); L – lung (3 symptoms); E- endocrine (9 symptoms); G- gastrointestinal (3 symptoms); V – vision and eyes (4 symptoms); O- others (5 symptoms).

**Supplemental Material S3. Principles of grouping comorbidities.**

|                                                                                                                                                                                                                                  |                                                                                                                                                                                                          |                                                                                                                                                               |
|----------------------------------------------------------------------------------------------------------------------------------------------------------------------------------------------------------------------------------|----------------------------------------------------------------------------------------------------------------------------------------------------------------------------------------------------------|---------------------------------------------------------------------------------------------------------------------------------------------------------------|
| <b>HEART DISEASES:</b> <ul style="list-style-type: none"> <li>• Arterial hypertension/hypotension</li> <li>• Arrhythmia</li> <li>• Tachycardia</li> <li>• Heart failure</li> <li>• Pericarditis</li> </ul>                       | <b>ENDOCRINE DISEASES:</b> <ul style="list-style-type: none"> <li>• Diabetes mellitus</li> <li>• Hypothyroidism/Hyperthyroidism</li> <li>• Obesity</li> <li>• Other metabolic diseases</li> </ul>        | <b>PSYCHIATRIC DISEASES:</b> <ul style="list-style-type: none"> <li>• Anxiety</li> <li>• Depression</li> <li>• Other/various psychiatric disorders</li> </ul> |
| <b>DISEASES OF THE NERVOUS SYSTEM:</b> <ul style="list-style-type: none"> <li>• Sleep disorders</li> <li>• Migraine</li> <li>• Headache</li> <li>• Chronic pain syndrome</li> <li>• Various neuralgias, radiculopathy</li> </ul> | <b>DISEASES OF THE DIGESTIVE SYSTEM:</b> <ul style="list-style-type: none"> <li>• Inflammation of the digestive tract</li> <li>• Liver function disorders</li> <li>• Reflux</li> <li>• Ulcers</li> </ul> | <b>SKIN DISEASES:</b> <ul style="list-style-type: none"> <li>• Allergies</li> <li>• Rashes</li> <li>• Psoriasis</li> <li>• Dry, sensitive skin</li> </ul>     |
| <b>RHEUMATIC/INFLAMMATORY DISEASES:</b> <ul style="list-style-type: none"> <li>• Various arthritis</li> <li>• Inflammation of the joints</li> <li>• Bone/joint/muscle pain</li> </ul>                                            | <b>RESPIRATORY SYSTEM DISEASES:</b> <ul style="list-style-type: none"> <li>• Pneumonia</li> <li>• Bronchitis</li> <li>• Asthma</li> <li>• Other lung diseases</li> </ul>                                 | <b>KIDNEY DISEASES:</b> <ul style="list-style-type: none"> <li>• Kidney failure</li> <li>• Inflammations</li> </ul>                                           |
|                                                                                                                                                                                                                                  | <b>OTHER:</b> <ul style="list-style-type: none"> <li>• Anemia</li> <li>• Visual disturbances</li> <li>• Lack of vitamins/micronutrients</li> <li>• Coagulation disorders</li> </ul>                      |                                                                                                                                                               |

|  |                                                                                                |  |
|--|------------------------------------------------------------------------------------------------|--|
|  | <ul style="list-style-type: none"> <li>• Various unspecified inflammations/diseases</li> </ul> |  |
|--|------------------------------------------------------------------------------------------------|--|

**Supplemental Material S4.** Principles of grouping medication.

|                                                      |                                                                                                                                                                                                                                                                                       |
|------------------------------------------------------|---------------------------------------------------------------------------------------------------------------------------------------------------------------------------------------------------------------------------------------------------------------------------------------|
| Drugs acting on the cardiovascular system            | <ul style="list-style-type: none"> <li>• Anti-arrhythmic</li> <li>• Anti-hypertensive</li> <li>• Anti-hypotensive</li> <li>• Regulating blood circulation: <ul style="list-style-type: none"> <li>• anti-anemics</li> <li>• statins</li> <li>• anti-thrombotic</li> </ul> </li> </ul> |
| Supplements/vitamins                                 | <ul style="list-style-type: none"> <li>• Vitamins</li> <li>• Supplements</li> <li>• Micro elements</li> </ul>                                                                                                                                                                         |
| Anti-asthmatic drugs                                 | <ul style="list-style-type: none"> <li>• Anti-asthmatics</li> <li>• Inhalers</li> </ul>                                                                                                                                                                                               |
| Nonsteroidal anti-inflammatory drugs and antibiotics | <ul style="list-style-type: none"> <li>• NSAIDs</li> <li>• Antibiotics</li> </ul>                                                                                                                                                                                                     |
| Drugs acting on the endocrine system                 | <ul style="list-style-type: none"> <li>• Various hormones</li> <li>• Glucocorticoids</li> <li>• Anti-diabetics</li> </ul>                                                                                                                                                             |
| Psychopharmacological drugs                          | <ul style="list-style-type: none"> <li>• Psycholeptics</li> <li>• Psychoanaleptics</li> <li>• Antidepressants</li> </ul>                                                                                                                                                              |
| Drugs acting on the gastrointestinal tract           | <ul style="list-style-type: none"> <li>• Anti-reflux</li> </ul>                                                                                                                                                                                                                       |
| Other                                                | <ul style="list-style-type: none"> <li>• Anti-tumor</li> <li>• Anti-allergic</li> <li>• Homeopathic</li> <li>• Other unspecified</li> </ul>                                                                                                                                           |

Names of drugs as indicated in the survey.

| DRUGS ACTING ON THE CARDIOVASCULAR SYSTEM |                                                                                                                                                                                                                                                                                                                                                                                                                                                                                                                                                                                                                                                                                                                                                                         |
|-------------------------------------------|-------------------------------------------------------------------------------------------------------------------------------------------------------------------------------------------------------------------------------------------------------------------------------------------------------------------------------------------------------------------------------------------------------------------------------------------------------------------------------------------------------------------------------------------------------------------------------------------------------------------------------------------------------------------------------------------------------------------------------------------------------------------------|
| Anti-hypertensive                         | <ul style="list-style-type: none"> <li>• Agen (<i>amlodipine</i>)</li> <li>• Amlodipine</li> <li>• Betalok (<i>metoprolol</i>)</li> <li>• Cosimprel (<i>perindopril and bisoprolol</i>)</li> <li>• Kaptopril</li> <li>• Lisinopril</li> <li>• Metoprololum (<i>metoprolol</i>)</li> <li>• Nebilet (<i>nebivolol</i>)</li> <li>• Nebivololum</li> <li>• Noliprelis (<i>perindopril and indapamide</i>)</li> <li>• Tarka (<i>trandolapril and verapamil</i>)</li> <li>• Ramiprilum</li> <li>• Valsakombi (<i>valsartan and hydrochlorthiazide</i>)</li> <li>• Valsartanum</li> <li>• Viacorma (<i>perindopril and amlodipine</i>)</li> <li>• Zovanat (<i>meldonium</i>)</li> <li>• Trental (<i>pentoxifylline</i>)</li> <li>• Preductal (<i>trimetazidine</i>)</li> </ul> |

|                              |                                                                                                                                                                                                                                                                                                                                                                                                                                                                                                                                                                                                                                                                                                                                                                                                                                             |
|------------------------------|---------------------------------------------------------------------------------------------------------------------------------------------------------------------------------------------------------------------------------------------------------------------------------------------------------------------------------------------------------------------------------------------------------------------------------------------------------------------------------------------------------------------------------------------------------------------------------------------------------------------------------------------------------------------------------------------------------------------------------------------------------------------------------------------------------------------------------------------|
|                              | <ul style="list-style-type: none"> <li>• Mildronat (<i>meldonium</i>)</li> <li>• Ivabradin</li> <li>• Implicor (<i>metoprolol and ivabradine</i>)</li> <li>• Others: antihypertensive</li> </ul>                                                                                                                                                                                                                                                                                                                                                                                                                                                                                                                                                                                                                                            |
| Anti-arrhythmics             | <ul style="list-style-type: none"> <li>• Rhythmonorm (<i>propafenone</i>)</li> <li>• Others: drugs regulating heart pulse</li> </ul>                                                                                                                                                                                                                                                                                                                                                                                                                                                                                                                                                                                                                                                                                                        |
| Anticoagulants               | <ul style="list-style-type: none"> <li>• Apixabanum</li> <li>• Aspirine (<i>acetylsalicylic acid</i>)</li> <li>• Eliquim (<i>apixabanum</i>)</li> <li>• Trombo (<i>acetylsalicylic acid</i>)</li> <li>• Xarelto (<i>rivaroxabanum</i>)</li> <li>• Anti-thrombosis (<i>acetylsalicylic acid</i>)</li> </ul>                                                                                                                                                                                                                                                                                                                                                                                                                                                                                                                                  |
| Anti-anaemics                | <ul style="list-style-type: none"> <li>• Tardiferon</li> </ul>                                                                                                                                                                                                                                                                                                                                                                                                                                                                                                                                                                                                                                                                                                                                                                              |
| Statins                      | <ul style="list-style-type: none"> <li>• Atoris (<i>atorvastatinum</i>)</li> </ul>                                                                                                                                                                                                                                                                                                                                                                                                                                                                                                                                                                                                                                                                                                                                                          |
| Anti-vertigo                 | <ul style="list-style-type: none"> <li>• Betahistine</li> <li>• Betaserc (<i>betahistine</i>)</li> <li>• Reducing dizziness</li> </ul>                                                                                                                                                                                                                                                                                                                                                                                                                                                                                                                                                                                                                                                                                                      |
| <b>SUPPLEMENTS/ VITAMINS</b> |                                                                                                                                                                                                                                                                                                                                                                                                                                                                                                                                                                                                                                                                                                                                                                                                                                             |
| Vitamins                     | <ul style="list-style-type: none"> <li>• A, B, C, D, E,</li> <li>• Vit. Oxylyc</li> <li>• Vit. against hair loss</li> <li>• Vit. for energy</li> <li>• Vit. To strengthen immunity</li> <li>• Milgamma<br/>(<i>benfotiamine/piridoksin/cyanocobalamin</i>)</li> <li>• Multivitamins</li> <li>• Minerals</li> <li>• Neurorubine (<i>tiamine/piridoksin/ cyanocobalamin</i>)</li> <li>• Well women (<i>multivitamin for women</i>)</li> <li>• Vitamins</li> <li>• Others: neuro-injection ampulle</li> </ul>                                                                                                                                                                                                                                                                                                                                  |
| Supplements and OTC drugs    | <ul style="list-style-type: none"> <li>• Antioxidants</li> <li>• Arthryl (<i>glucosamine sulfate</i>)</li> <li>• Aterolip (<i>red yeast fermented rice powder</i>)</li> <li>• Astaksantin</li> <li>• Atlant (<i>collagen/ vitamin C, calcium</i>)</li> <li>• Atmosil (<i>food supplement with herbal extracts, pterostilbene, quercetin, lycopene and algae</i>)</li> <li>• Beauty Collagen</li> <li>• Biozink</li> <li>• Cantalin (<i>diosmin/hesperidin</i>)</li> <li>• Cardiopill (<i>vitamin C/ CoQ 10</i>)</li> <li>• Carsil (<i>silimarin</i>)</li> <li>• Cerebrum Compositum (<i>cerebrum suis, embryo suis, hepar suis, placenta suis, kalium phosphoricum, selenium, thuja, ignatia, bothrops lanceolatus, acidum phosphoricum, china, manganum phosphoricum, magnesium phosphoricum, anacardium, conium, luesinum-</i></li> </ul> |

|  |                                                                                                                                                                                                                                                                                                                                                                                                                                                                                                                                                                                                                                                                                                                                                                                                                                                                                                                                                                                                                                                                                                                                                                                                                                                                                                                                                                                                                                                                                                                                                                                                                                                                                                                                                                                                                                                                                                                                                                                                                                                                                                                                                                                                       |
|--|-------------------------------------------------------------------------------------------------------------------------------------------------------------------------------------------------------------------------------------------------------------------------------------------------------------------------------------------------------------------------------------------------------------------------------------------------------------------------------------------------------------------------------------------------------------------------------------------------------------------------------------------------------------------------------------------------------------------------------------------------------------------------------------------------------------------------------------------------------------------------------------------------------------------------------------------------------------------------------------------------------------------------------------------------------------------------------------------------------------------------------------------------------------------------------------------------------------------------------------------------------------------------------------------------------------------------------------------------------------------------------------------------------------------------------------------------------------------------------------------------------------------------------------------------------------------------------------------------------------------------------------------------------------------------------------------------------------------------------------------------------------------------------------------------------------------------------------------------------------------------------------------------------------------------------------------------------------------------------------------------------------------------------------------------------------------------------------------------------------------------------------------------------------------------------------------------------|
|  | <p><i>nosode, medorrhinum-nosode, hyoscyamus, aconitum, cocculus, ambra, sulfur, kalium bichromaticum, gelsemium, ruta, arnica, aesculus)</i></p> <ul style="list-style-type: none"> <li>• Chlorofilum</li> <li>• Cholesterol Balance (<i>hop cone, plantain seeds, red yeast, monacolin K, burdock root, berberine hydrochloride, vegetable artichoke leaf, choline, policosanols</i>)</li> <li>• Chromas</li> <li>• Cinie</li> <li>• Zinc</li> <li>• Cordyceps</li> <li>• Essentiale Forte (<i>phospholipida ex soia</i>)</li> <li>• Eukamirsan (<i>eucalyptus, myrtle, orange and lemon essential oils</i>)</li> <li>• Echinacae preparations</li> <li>• Felxit (<i>calcium, vitamin C, magnesium, vitamin B6, Vitamin D3, chondroitin, glucosamine sulfate, collagen, hialuronic acid, proline</i>)</li> <li>• Feroglobin/Ferrotab</li> <li>• Flavamed (<i>ambroxol</i>)</li> <li>• Folic acid</li> <li>• Iron supplements</li> <li>• Gelomyrtol (<i>eucalyptus, sweet orange, myrtle, lemon essential oils</i>)</li> <li>• Probiotics</li> <li>• Preparations of Gink</li> <li>• Hawley Extract</li> <li>• Hepamax (<i>silimarin/vitamin C</i>)</li> <li>• Immuneco (<i>ginseng, CoQ 10</i>)</li> <li>• Immune boosting supplements</li> <li>• Imunosil Virufix (<i>cink, vitamin C</i>)</li> <li>• Calcium</li> <li>• Potassium</li> <li>• Kardicept (<i>essential oils, antioxidants</i>)</li> <li>• Koferm Q10</li> <li>• Kvercetin</li> <li>• Lepicol (<i>plantain peels, inulin, lactic acid bacteria</i>)</li> <li>• Magnesium</li> <li>• Miscellaneous supplements</li> <li>• Melatonin</li> <li>• Memory Plus (<i>phosphatidylserine/choline</i>)</li> <li>• Supplements to improve sleep</li> <li>• Evening Primrose oil</li> <li>• Nataspin (<i>nattokinase, monacolin, policonasolum, polyphenol</i>)</li> <li>• Neurozan (<i>ginseng, fostatidilcholin, fostatidilserin, CoQ 10</i>)</li> <li>• Omega-3</li> <li>• Panangin (<i>potassium, magnesium</i>)</li> <li>• Sedatif PC (<i>belladonna, calendula officinalis, chelidonium majus, abrus precatorius, viburnum opulus, aconitum napellus</i>)</li> <li>• Selenus</li> <li>• Spirulina (<i>spirulina platensis</i>)</li> </ul> |
|--|-------------------------------------------------------------------------------------------------------------------------------------------------------------------------------------------------------------------------------------------------------------------------------------------------------------------------------------------------------------------------------------------------------------------------------------------------------------------------------------------------------------------------------------------------------------------------------------------------------------------------------------------------------------------------------------------------------------------------------------------------------------------------------------------------------------------------------------------------------------------------------------------------------------------------------------------------------------------------------------------------------------------------------------------------------------------------------------------------------------------------------------------------------------------------------------------------------------------------------------------------------------------------------------------------------------------------------------------------------------------------------------------------------------------------------------------------------------------------------------------------------------------------------------------------------------------------------------------------------------------------------------------------------------------------------------------------------------------------------------------------------------------------------------------------------------------------------------------------------------------------------------------------------------------------------------------------------------------------------------------------------------------------------------------------------------------------------------------------------------------------------------------------------------------------------------------------------|



|                                                                             |                                                                                                                                                                                                                                                                                                                                                                                                                                                                                                                                                                                                                                                                                                                                                                                                          |
|-----------------------------------------------------------------------------|----------------------------------------------------------------------------------------------------------------------------------------------------------------------------------------------------------------------------------------------------------------------------------------------------------------------------------------------------------------------------------------------------------------------------------------------------------------------------------------------------------------------------------------------------------------------------------------------------------------------------------------------------------------------------------------------------------------------------------------------------------------------------------------------------------|
|                                                                             | <ul style="list-style-type: none"> <li>• Stop Stress (<i>valerian, passionflower</i>)</li> <li>• Stress Plex (<i>vitamin C, zinc</i>)</li> <li>• Valerosan (<i>valerian root extract, lemon balm leaf powder, fenugreek grass powder</i>)</li> <li>• Fishoil</li> <li>• Others: additional insomnia relief</li> </ul>                                                                                                                                                                                                                                                                                                                                                                                                                                                                                    |
| <b>DRUGS ACTING ON THE IMMUNE SYSTEM (ANTI-ASTHMATIC and ANTI-ALLERGIC)</b> |                                                                                                                                                                                                                                                                                                                                                                                                                                                                                                                                                                                                                                                                                                                                                                                                          |
| Anti-asthmatics                                                             | <ul style="list-style-type: none"> <li>• Easy Haler (<i>budesonidum</i>)</li> <li>• Inhaler (<i>salbutamolum</i>)</li> <li>• Interferon beta</li> <li>• Montelukast (<i>montelukastum</i>)</li> <li>• Salbutamolum</li> <li>• Others: against asthma</li> </ul>                                                                                                                                                                                                                                                                                                                                                                                                                                                                                                                                          |
| Anti-allergic                                                               | <ul style="list-style-type: none"> <li>• Bilastinum</li> <li>• Cirrus (<i>cetirizinum</i>)</li> <li>• Fexofenadine</li> <li>• Tavegil (<i>clemastinum</i>)</li> <li>• Others: anti-allergic</li> </ul>                                                                                                                                                                                                                                                                                                                                                                                                                                                                                                                                                                                                   |
| <b>NON-STEROID ANTI-INFLAMMATORY and ANTI-BACTERIAL DRUGS</b>               |                                                                                                                                                                                                                                                                                                                                                                                                                                                                                                                                                                                                                                                                                                                                                                                                          |
| Antibiotics                                                                 | <ul style="list-style-type: none"> <li>• Amoxicillin</li> <li>• Amoxiklav (<i>amoxicillinum and acidum clavulanicum</i>)</li> <li>• Ospamox (<i>amoxicillinum</i>)</li> <li>• Others: antibiotics</li> </ul>                                                                                                                                                                                                                                                                                                                                                                                                                                                                                                                                                                                             |
| NSAID (Non-steroidal anti-inflammatory drugs):                              | <ul style="list-style-type: none"> <li>• Appap (<i>paracetamol</i>)</li> <li>• Arcoxia (<i>etoricoxib</i>)</li> <li>• Brexin (<i>piroxicam</i>)</li> <li>• Citramon (<i>acetylsalicylic acid, paracetamol, caffeine</i>)</li> <li>• Diclovit (<i>diclofenac and vitamine B<sub>1</sub>, B<sub>6</sub>, B<sub>12</sub></i>)</li> <li>• Fremanezubam</li> <li>• Ibumetin (<i>ibuprofen</i>)</li> <li>• Ibuprofen</li> <li>• Migard (<i>frovatriptan</i>)</li> <li>• Movali (<i>meloxicam</i>)</li> <li>• Naproxen</li> <li>• Nimesil (<i>nimesulid</i>)</li> <li>• Plasclidine (<i>avocado and soyabean oil</i>)</li> <li>• Scudex (<i>tramadol/dexketoprofen</i>)</li> <li>• Vimovo (<i>naproxenum/esomeprazole</i>)</li> <li>• Others: ointments for pain, against pain, against inflammation</li> </ul> |
| <b>DRUGS ACTING ON THE ENDOCRINE SYSTEM</b>                                 |                                                                                                                                                                                                                                                                                                                                                                                                                                                                                                                                                                                                                                                                                                                                                                                                          |
| Hormones                                                                    | <ul style="list-style-type: none"> <li>• Hormones</li> <li>• L-Thyroxine (<i>levothyroxine</i>)</li> <li>• Thyroxine</li> </ul>                                                                                                                                                                                                                                                                                                                                                                                                                                                                                                                                                                                                                                                                          |
| Glucocorticoids                                                             | <ul style="list-style-type: none"> <li>• Medrol (<i>methylprednisolone</i>)</li> <li>• Prednisolon</li> </ul>                                                                                                                                                                                                                                                                                                                                                                                                                                                                                                                                                                                                                                                                                            |
| Anti-diabetes                                                               | <ul style="list-style-type: none"> <li>• Metformin (<i>metformin</i>)</li> <li>• Tivulin (<i>metformin</i>)</li> </ul>                                                                                                                                                                                                                                                                                                                                                                                                                                                                                                                                                                                                                                                                                   |

| PSYCHOPHARMACOLOGICAL DRUGS                 |                                                                                                                                                                                                                                                                                                                                                                                                                                                                                                                                                                                                                                                                                                                                                                                                                                                                                                                                                                                                                                                                                 |
|---------------------------------------------|---------------------------------------------------------------------------------------------------------------------------------------------------------------------------------------------------------------------------------------------------------------------------------------------------------------------------------------------------------------------------------------------------------------------------------------------------------------------------------------------------------------------------------------------------------------------------------------------------------------------------------------------------------------------------------------------------------------------------------------------------------------------------------------------------------------------------------------------------------------------------------------------------------------------------------------------------------------------------------------------------------------------------------------------------------------------------------|
| Antidepressants                             | <ul style="list-style-type: none"> <li>• Amytryptilin</li> <li>• Cipralel (<i>escitalopram</i>)</li> <li>• Escitalopram</li> <li>• Mirtazepine (<i>mirtazapin</i>)</li> <li>• Antidepressants</li> </ul>                                                                                                                                                                                                                                                                                                                                                                                                                                                                                                                                                                                                                                                                                                                                                                                                                                                                        |
| Psycholeptics                               | <ul style="list-style-type: none"> <li>• Zolpidem</li> <li>• Zopiclone</li> <li>• Xanax (<i>alprazolam</i>)</li> <li>• Quetiapine</li> <li>• Lexotanil (<i>bromazepam</i>)</li> <li>• Halcion (<i>triazolamum</i>)</li> <li>• Bromazepamum (<i>bromazepam</i>)</li> </ul>                                                                                                                                                                                                                                                                                                                                                                                                                                                                                                                                                                                                                                                                                                                                                                                                       |
| Psychoanalytic:                             | <ul style="list-style-type: none"> <li>• Cavinton (<i>vinpocetinum</i>)</li> <li>• Noritren (<i>nortriptyline</i>)</li> <li>• Pyracetamum (<i>piracetam</i>)</li> <li>• Pramistar (<i>pramiracetam</i>)</li> <li>• Tanakan (<i>ginkgo folium</i>)</li> <li>• Valdaxan (<i>agomelatine</i>)</li> </ul>                                                                                                                                                                                                                                                                                                                                                                                                                                                                                                                                                                                                                                                                                                                                                                           |
| DRUGS ACTING ON THE GASTROINTESTINAL SYSTEM |                                                                                                                                                                                                                                                                                                                                                                                                                                                                                                                                                                                                                                                                                                                                                                                                                                                                                                                                                                                                                                                                                 |
| Anti-reflux                                 | <ul style="list-style-type: none"> <li>• Malox (magnesium hydroxide/aluminium hydroxide)</li> <li>• Nexium (<i>esomeprazole</i>)</li> <li>• Omeprazol</li> <li>• Others: against reflux</li> </ul>                                                                                                                                                                                                                                                                                                                                                                                                                                                                                                                                                                                                                                                                                                                                                                                                                                                                              |
| OTHER DRUGS                                 |                                                                                                                                                                                                                                                                                                                                                                                                                                                                                                                                                                                                                                                                                                                                                                                                                                                                                                                                                                                                                                                                                 |
| Other drugs                                 | <ul style="list-style-type: none"> <li>• ACC600 (<i>acetylcysteine</i>)</li> <li>• Ambio</li> <li>• Ambroxol</li> <li>• Relaxing nights</li> <li>• Against vomiting</li> <li>• Biological therapy</li> <li>• Bloxivir (<i>oral spray gel</i>)</li> <li>• Thyme Tea</li> <li>• Detralel (<i>diosminum/hesperidinum</i>)</li> <li>• Enterol (<i>Saccharomyces boulardii</i>)</li> <li>• Floconazole</li> <li>• Hydroxizyne</li> <li>• Buckwheat Tea</li> <li>• Other</li> <li>• Creams for the treatment of skin disease</li> <li>• Eye drops</li> <li>• Mysimba (<i>bupropion/naltrexone</i>)</li> <li>• Nasogast</li> <li>• Nasonex (<i>mometasone furoatum</i>)</li> <li>• Pangrol (<i>pancreatinum</i>)</li> <li>• Plaquenil (<i>hydroxychloroquinum</i>)</li> <li>• Rehydron (<i>powder for oral solution glucose, sodium chloride, sodium citrate and potassium chloride</i>)</li> <li>• Roswera (<i>rosuvastatin</i>)</li> <li>• Sinupret (<i>verbena herb, gentian root, sorrel herb, elderflower, primrose flower</i>)</li> <li>• Smecta (<i>diosmectite</i>)</li> </ul> |

|  |                                                                                                                                                                                                                                                                                                                                                                                                                               |
|--|-------------------------------------------------------------------------------------------------------------------------------------------------------------------------------------------------------------------------------------------------------------------------------------------------------------------------------------------------------------------------------------------------------------------------------|
|  | <ul style="list-style-type: none"> <li>• Strepisils (<i>flurbiprofen</i>)</li> <li>• Improve brain functions</li> <li>• Non-prescribed sedative medicines</li> <li>• Expanding drugs</li> <li>• Heart dropps</li> <li>• Medicinal herbs</li> <li>• Valerian</li> <li>• Herbal Teas/Tinctures</li> <li>• Olynth (<i>xylometazoline</i>)</li> <li>• Others: anti-anxiety, anti-insomnia, anti-cough, anti-hair loss.</li> </ul> |
|--|-------------------------------------------------------------------------------------------------------------------------------------------------------------------------------------------------------------------------------------------------------------------------------------------------------------------------------------------------------------------------------------------------------------------------------|
